# Supplementary material for: Assessment of the validity and reliability of edinburgh postpartum depression scale in Turkish men
Source: publisher site journal article supplement (doi:10.1515/jpm-2024-0026), 2024-10-08
Supplement: Supplementary file 1 [file j_jpm-2024-0026_suppl_001.docx]

**Supplementary Material 1:** List of questions in the study-specific sociodemographic, health and perinatal environment survey (answers can be found in Supplement Table 2)

|  | **Turkish** | **English (translated for this table)** |
| --- | --- | --- |

| **Sociodemographic factors** | | |
| --- | --- | --- |
| **1.** | Yaşınız kaç? | What is your age? |
| **2.** | Eğitim durumunuz nedir? | What is your educational status? |
| **3.** | Şu anki istihdam durumunuz nedir? | What is your current employment status? |
| **4.** | Mesleğiniz veya işiniz nedir? | What is your profession or occupation? |
| **5.** | Sosyal güvenliğiniz veya herhangi bir sosyal  korumanız var mı? | Do you have social security or any form of social  protection? |
| **6.** | Şu anki ekonomik durumunuzu nasıl  tanımlarsınız? | How would you describe your current economic  situation? |
| **7.** | Kaç evlilik yaptınız? | How many marriages have you been in? |
| **8.** | Evlilik anlaşmanız veya düzenlemeleriniz  hakkında detaylar paylaşabilir misiniz? | Can you share details about your marriage  agreement or arrangements? |
| **9.** | Kaç yıllık evlisiniz? | How long you have been married? |
| **10.** | Eşinizin hamileliğinden doğan kaçıncı çocuk? | What is the number of children born from the  mother's pregnancy? |
| **11.** | Bebeğiniz kaç aylık? | Please write the month of your baby? |
| **12.** | Planlanan bir gebelik miydi? | Was it a planned pregnancy? |

| **Health information** | | |
| --- | --- | --- |
| **13.** | Bilinen herhangi bir sağlık sorununuz veya  tıbbi durumunuz var mı? | Do you have any known health problems or  medical conditions? |
| **14.** | Sağlığınız için düzenli olarak ilaç kullanıyor  musunuz? | Are you taking any medication regularly for your  health? |
| **15.** | Maddi madde kullanım durumunuz hakkında  bilgi verebilir misiniz? | Can you provide information about your  substance use status? |

| **Support** | | |
| --- | --- | --- |
| **16.** | Hamilelik sürecinde eşinize kimse destek oldu  mu? | Did anyone support your wife throughout the  pregnancy? |
| **17.** | Hamilelik sürecinde eşinizi kişisel olarak  desteklediniz mi? | Did you personally support your wife during  pregnancy? |
| **18.** | Hamilelik sürecinde ailenizin yaşlı üyeleri  eşinizi destekledi mi? | Did your elder family members support your wife  during pregnancy? |
| **19.** | Eşinizin hamilelik sürecinde arkadaşları size  yardımcı oldu mu? | Did your wife's friends help you during  pregnancy? |
| **20.** | Hamilelik sürecinde eşinize yardımcı olan bir  yardımcı bakıcı var mıydı? | Was there an assistant caregiver who supported  your wife during pregnancy? |
| **21.** | Hamilelik sürecinde eşinize başka insanlar  destek sağladı mı? | Did other people provide support to your wife  during pregnancy? |
| **22.** | Eşiniz doğum yaptıktan sonra kimse eşinize  destek oldu mu? | Did anyone support your wife after giving birth? |
| **23.** | Çocuğunuz doğduktan sonra eşinizi kişisel  olarak desteklediniz mi? | Did you support your wife personally after the  birth of your child? |
| **24.** | Doğumdan sonra eşinizi aile büyükleri  destekledi mi? | Did family elders support your wife after the  birth? |
| **25.** | Doğumdan sonra eşinizi arkadaşlar destekledi  mi? | Did friends support your wife after the birth? |

| **26.** | Doğumdan sonra eşinize yardımcı olan bir  yardımcı bakıcı var mıydı? | 26. Was there an assistant caregiver who  supported your wife after the birth? |
| --- | --- | --- |
| **27.** | Doğumdan sonra başka insanlar eşinize  destek sağladı mı? | Did other people provide support to your wife  after the birth? |

| **Paternal roles and beliefs** | | |
| --- | --- | --- |
| **28.** | Eşinize hamilelik sürecinde verdiğiniz destek  seviyesini nasıl değerlendirirsiniz? | How would you rate your level of support to your  wife during her pregnancy? |
| **29.** | Eşinizin hamilelik sırasındaki muayenelerdeki  desteğinizi nasıl değerlendirirsiniz? | How would you evaluate your support to your  wife in check-ups while she was pregnant? |
| **30.** | Eşinizin hamilelik sırasındaki beslenmesine ne kadar dikkat ettiğinizi nasıl  değerlendirirsiniz? | How do you rate yourself in terms of paying attention to your wife's nutrition during her  pregnancy? |
| **31.** | Eşinizin hamilelik sırasındaki egzersizine ne kadar dikkat ettiğinizi nasıl  değerlendirirsiniz? | How do you rate yourself in terms of paying attention to your wife's exercise during her  pregnancy? |
| **32.** | Sizin görüşünüze göre, ebeveynlik kurslarına  aktif olarak katıldınız mı? | Did you actively participate in parenting courses? |
| **33.** | Doğumdan sonra eşinize verdiğiniz destek  seviyesini nasıl değerlendirirsiniz? | How would you rate your level of support to your  wife after the birth? |
| **34.** | Eşiniz, bebeği doğurmadan önce sizi ne  ölçüde destekledi? | To what extent did the expectant mother support  the expectant father during her pregnancy? |
| **35.** | Eşiniz, bebeği doğurduktan sonra sizi ne ölçüde destekledi? | To what extent did the expectant mother support the expectant father after the birth? |
| **36.** | “Sadece anne, çocuğu büyütmek ve bakmak  için yeterli" görüşünü destekliyor musunuz? | Do you agree with the view that "only the mother  is enough to care for and raise the child"? |
| **37.** | "Baba, çocuğun büyümesinde anne kadar sorumluluk taşımalıdır" görüşünü destekliyor  musunuz? | Do you agree with the view that "the father has as much responsibility as the mother in the child's  growth"? |
| **38.** | Kendinizi bir baba olarak yeterli görüyor  musunuz? | How do you see yourself in terms of adequacy as  a father? |
| **39.** | Bebeğinize bakmaya ne kadar zaman  harcıyorsunuz? | How much time do you devote to taking care of  your baby? |
| **40.** | Bebeğin bakımında ne kadar yardımcı  oluyorsunuz? | How much do you help in the care of the baby? |
| **41.** | Baba olarak sorumluluklarınızı ne kadar iyi  yerine getirdiğinizi düşünüyorsunuz? | How well do you think you are fulfilling your  responsibilities as a father? |

**Supplementary Material 2:** Descriptive statistics of the variables collected by the participant information survey

| **Variable** | **Categories** | **Sample size** | **Frequency (%)** |
| --- | --- | --- | --- |

| **Sociodemographic factors** | | | |
| --- | --- | --- | --- |
| **1. What is your age?** |  |  |  |
|  | 19-25 | 56 | 19.0 |
|  | 26-30 | 98 | 33.2 |
|  | 31-35 | 98 | 33.2 |
|  | 36 and over | 43 | 14.6 |
| **2. What is your educational status?** |  |  |  |
|  | primary education-  secondary education | 19 | 6.4 |
|  | high school | 92 | 31.2 |
|  | university-college | 184 | 62.4 |
| **3. What is your current employment status?** | working | 295 | 100.0 |
| **4. What is your profession or occupation?** |  |  |  |
|  | civil servant public | 133 | 45.1 |
|  | private sector employee | 114 | 38.6 |
|  | private sector business  owner | 40 | 13.6 |
| **5. Do you have social security or any form of social protection?** |  |  |  |
|  | no | 20 | 6.8 |
|  | yes | 275 | 93.2 |
| **6. How would you describe your current economic situation?** |  |  |  |
|  | very good | 18 | 6.1 |
|  | good | 87 | 29.5 |
|  | middle | 168 | 56.9 |
|  | bad | 22 | 7.5 |
|  | very bad | 0 | 0.0 |
| **7. How many marriages have you been in?** |  |  |  |
|  | father's first marriage | 267 | 90.5 |
|  | father's second marriage | 28 | 9.5 |
| **8. Can you share details about your marriage agreement or arrangements?** |  |  |  |
|  | arranged | 60 | 20.3 |
|  | agreement | 235 | 79.7 |
| **9. How long you have been married?** |  |  |  |
|  | 1-2 years | 116 | 39.3 |
|  | 3-4 years | 83 | 28.1 |
|  | 5-9 years | 67 | 22.7 |
|  | >10 years | 29 | 9.8 |
| **10. What is the number of children born from the mother's pregnancy?** |  |  |  |
|  | first | 192 | 65.1 |
|  | second | 86 | 29.2 |
|  | third | 15 | 5.1 |
|  | fourth | 2 | 0.7 |
| **11. Please write the month of your baby?** |  |  |  |
|  | 1 | 40 | 13.6 |
|  | 2 | 35 | 11.9 |

|  | 3 | 38 | 12.9 |
| --- | --- | --- | --- |
|  | 4 | 29 | 9.8 |
|  | 5 | 32 | 10.8 |
|  | 6 | 27 | 9.2 |
|  | 7 | 23 | 7.8 |
|  | 8 | 14 | 4.7 |
|  | 9 | 22 | 7.5 |
|  | 10 | 15 | 5.1 |
|  | 11 | 16 | 5.4 |
|  | 12 | 4 | 1.4 |
| **12. Was it a planned pregnancy?** |  |  |  |
|  | no | 115 | 39.0 |
|  | yes | 180 | 61.0 |

| **Health information** | | | |
| --- | --- | --- | --- |
| **13. Do you have any known health problems or medical conditions?** |  |  |  |
|  | no | 294 | 99.7 |
|  | yes | 1 | 0.3 |
| **14. Are you taking any medication regularly for your health?** |  |  |  |
|  | no | 295 | 100.0 |
| **15. Can you provide information about your substance use status?** |  |  |  |
|  | none | 118 | 40.0 |
|  | cigarette | 138 | 46.8 |
|  | cigarettes and alcohol | 39 | 13.2 |

| **Support** | | | |
| --- | --- | --- | --- |
| **16. Did anyone support your wife throughout the pregnancy?** |  |  |  |
|  | yes | 277 | 93.9 |
|  | no | 18 | 6.1 |
| **17. Did you personally support your wife during pregnancy?** |  |  |  |
|  | yes | 259 | 87.8 |
|  | no | 36 | 12.2 |
| **18. Did your elder family members support your wife during pregnancy?** |  |  |  |
|  | yes | 228 | 77.3 |
|  | no | 67 | 22.7 |
| **19. Did your wife's friends help you during pregnancy?** |  |  |  |
|  | yes | 55 | 18.6 |
|  | no | 240 | 81.4 |
| **20. Was there an assistant caregiver who supported your wife during pregnancy?** |  |  |  |
|  | yes | 28 | 9.5 |
|  | no | 267 | 90.5 |
| **21. Did other people provide support to your wife during pregnancy?** |  |  |  |
|  | yes | 4 | 1.4 |
|  | no | 291 | 98.6 |
| **22. Did anyone support your wife after giving birth?** |  |  |  |

|  | yes | 288 | 97.6 |
| --- | --- | --- | --- |
|  | no | 7 | 2.4 |
| **23. Did you support your wife personally after the birth of your child?** |  |  |  |
|  | yes | 259 | 87.8 |
|  | no | 36 | 12.2 |
| **24. Did family elders support your wife after the birth?** |  |  |  |
|  | yes | 250 | 84.7 |
|  | no | 45 | 15.3 |
| **25. Did friends support your wife after the birth?** |  |  |  |
|  | yes | 52 | 17.6 |
|  | no | 243 | 82.4 |
| **26. Was there an assistant caregiver who supported your wife after the birth?** |  |  |  |
|  | yes | 28 | 9.5 |
|  | no | 267 | 90.5 |
| **27. Did other people provide support to your wife after the birth?** |  |  |  |
|  | yes | 3 | 1.0 |
|  | no | 292 | 99.0 |

| **Paternal roles and beliefs** | | | |
| --- | --- | --- | --- |
| **28. How would you rate your level of support to your wife during her pregnancy?** |  |  |  |
|  | I was very supportive | 134 | 45.4 |
|  | I supported | 136 | 46.1 |
|  | I partially supported | 22 | 7.5 |
|  | I did not support | 2 | 0.7 |
|  | I never supported | 1 | 0.3 |
| **29. How would you evaluate your support to your wife in check-ups while she was pregnant?** |  |  |  |
|  | very good | 161 | 54.6 |
|  | good | 86 | 29.2 |
|  | middle | 37 | 12.5 |
|  | bad | 9 | 3.1 |
|  | too bad | 2 | 0.7 |
| **30. How do you rate yourself in terms of paying attention to your wife's nutrition**  **during her pregnancy?** |  |  |  |
|  | very good | 135 | 45.8 |
|  | good | 119 | 40.3 |
|  | middle | 34 | 11.5 |
|  | bad | 4 | 1.4 |
|  | too bad | 3 | 1.0 |
| **31. How do you rate yourself in terms of paying attention to your wife's exercise during her pregnancy?** |  |  |  |
|  | very good | 100 | 33.9 |
|  | good | 102 | 34.6 |
|  | middle | 58 | 19.7 |
|  | bad | 26 | 8.8 |
|  | too bad | 9 | 3.1 |

| **32. Did you actively participate in parenting courses?** |  |  |  |
| --- | --- | --- | --- |
|  | totally participated | 2 | 0.7 |
|  | participate | 0 | 0.0 |
|  | some participation | 0 | 0.0 |
|  | not participated | 12 | 4.1 |
|  | not participated at all | 281 | 95.3 |
| **33. How would you rate your level of support to your wife after the birth?** |  |  |  |
|  | I was very supportive | 134 | 45.4 |
|  | I supported | 138 | 46.8 |
|  | I partially supported | 20 | 6.8 |
|  | I did not support | 2 | 0.7 |
|  | I never supported | 1 | 0.3 |
| **34. To what extent did the expectant mother support the expectant father during her pregnancy?** |  |  |  |
|  | very supportive | 65 | 22.0 |
|  | supported | 162 | 54.9 |
|  | partially supported | 41 | 13.9 |
|  | did not support | 24 | 8.1 |
|  | never supported | 3 | 1.0 |
| **35. To what extent did the expectant mother support the expectant father after the birth?** |  |  |  |
|  | very supportive | 57 | 19.3 |
|  | supported | 156 | 52.9 |
|  | partially supported | 53 | 18.0 |
|  | did not support | 24 | 8.1 |
|  | never supported | 5 | 1.7 |
| **36. Do you agree with the view that "only the mother is enough to care for and**  **raise the child"?** |  |  |  |
|  | I don't agree at all | 119 | 40.3 |
|  | I do not agree | 126 | 42.7 |
|  | no idea | 6 | 2 |
|  | I agree | 19 | 6.4 |
|  | I totally agree | 25 | 8.5 |
| **37. Do you agree with the view that "the father has as much responsibility as the**  **mother in the child's growth"?** |  |  |  |
|  | I totally agree | 144 | 48.8 |
|  | I agree | 135 | 45.8 |
|  | no idea | 5 | 1.7 |
|  | I do not agree | 7 | 2.4 |
|  | I don't agree at all | 4 | 1.4 |
| **38. How do you see yourself in terms of adequacy as a father?** |  |  |  |
|  | very sufficient | 89 | 30.2 |
|  | sufficient | 177 | 60.0 |
|  | partially sufficient | 11 | 3.7 |
|  | not enough | 11 | 3.7 |
|  | not enough at all | 7 | 2.4 |
| **39. How much time do you devote to taking care of your baby?** |  |  |  |
|  | a lot of time | 73 | 24.7 |
|  | enough time | 176 | 59.7 |
|  | some time | 34 | 11.5 |

|  | can't spare time | 10 | 3.4 |
| --- | --- | --- | --- |
|  | any time | 2 | 0.7 |
| **40. How much do you help in the care of the baby?** |  |  |  |
|  | I am very helpful | 52 | 17.6 |
|  | I help | 109 | 36.9 |
|  | I can help partially | 112 | 38.0 |
|  | I’m not helping | 12 | 4.1 |
|  | I’m not helping at all | 10 | 3.4 |
| **41. How well do you think you are fulfilling your responsibilities as a father?** |  |  |  |
|  | I completely fulfil | 120 | 40.7 |
|  | I fulfil | 151 | 51.2 |
|  | I fulfil a little | 8 | 2.7 |
|  | I can't fulfil | 13 | 4.4 |
|  | I can't fulfil at all | 3 | 1.0 |

**Supplementary Material 3:** Exploratory Factor Analysis

| **Factor Loadings** | | | | |
| --- | --- | --- | --- | --- |
| **Factor 1** | | **Factor 2** | **Factor 3** | **Uniqueness** |
| Q10 | 0.863 |  |  | 0.289 |
| Q9 | 0.806 |  |  | 0.394 |
| Q7 | 0.590 |  |  | 0.441 |
| Q8 | 0.570 |  |  | 0.489 |
| Q5 | 0.529 |  |  | 0.478 |
| Q1 |  | 1.001 |  | 0.005 |
| Q2 |  | 0.402 |  | 0.646 |
| Q3 |  |  | 0.536 | 0.695 |
| Q6 |  |  | 0.430 | 0.669 |
| Q4 |  |  | 0.403 | 0.770 |
| *Note.* Applied rotation method is oblimin. | | | | |

| **Factor Characteristics** | | | | | | | |
| --- | --- | --- | --- | --- | --- | --- | --- |
|  |  | **Unrotated solution** | | | **Rotated solution** | | |
| **Eigenvalues** | | **SumSq. Loadings** | **Proportion var.** | **Cumulative** | **SumSq. Loadings** | **Proportion var.** | **Cumulative** |
| Factor 1 | 4.399 | 3.971 | 0.397 | 0.397 | 2.704 | 0.270 | 0.270 |
| Factor 2 | 1.130 | 0.679 | 0.068 | 0.465 | 1.376 | 0.138 | 0.408 |
| Factor 3 | 0.930 | 0.484 | 0.048 | 0.513 | 1.043 | 0.104 | 0.512 |

| **Factor Correlations** | | | |
| --- | --- | --- | --- |
|  | **Factor 1** | **Factor 2** | **Factor 3** |
| Factor 1 | 1.000 | 0.527 | 0.459 |
| Factor 2 | 0.527 | 1.000 | 0.330 |
| Factor 3 | 0.459 | 0.330 | 1.000 |

| **Communalities** |  |
| --- | --- |
| Q1 | 0.999 |
| Q2 | 0.354 |
| Q3 | 0.305 |
| Q4 | 0.230 |
| Q5 | 0.522 |
| Q6 | 0.331 |
| Q7 | 0.559 |
| Q8 | 0.511 |
| Q9 | 0.606 |
| Q10 | 0.711 |
| *Note.* Extraction Method: Maximum Likelihood. | |

**Supplementary Material 4:** Sensitivity, specificity, positive and negative predictive values by cut-off EPDS scores

| To distinguish the mild to severe major depression risk | | | | |
| --- | --- | --- | --- | --- |
| **Cut-off EPDS scores (>=)** | **Sensitivity** | **Specificity** | **Positive predictive values** | **Negative predictive values** |
| 2 | 100 | 41.50943 | 40.09662 | 100 |
| 3 | 95.180723 | 69.81132 | 55.24476 | 97.36842 |
| 4 | 83.13253 | 89.15094 | 75 | 93.10345 |
| 5 | 67.46988 | 98.58491 | 94.91525 | 88.55932 |
| 6 | 57.831325 | 99.5283 | 97.95918 | 85.77236 |
| 7 | 39.759036 | 99.5283 | 97.05882 | 80.84291 |
| 8 | 22.891566 | 100 | 100 | 76.81159 |
| 9 | 15.662651 | 100 | 100 | 75.1773 |
| 10 | 14.457831 | 100 | 100 | 74.91166 |
| 11 | 10.843373 | 100 | 100 | 74.12587 |
| 12 | 8.433735 | 100 | 100 | 73.61111 |
| 13 | 8.433735 | 100 | 100 | 73.61111 |
| 14 | 6.024096 | 100 | 100 | 73.10345 |
| 15 | 6.024096 | 100 | 100 | 73.10345 |

| To distinguish the moderate to severe major depression risk | | | | |
| --- | --- | --- | --- | --- |
| **Cut-off EPDS scores (>=)** | **Sensitivity** | **Specificity** | **Positive predictive values** | **Negative predictive values** |
| 2 | 100 | 31.65468 | 8.21256 | 100 |
| 3 | 100 | 54.67626 | 11.88811 | 100 |
| 4 | 100 | 73.02158 | 18.47826 | 100 |
| 5 | 100 | 84.89209 | 28.81356 | 100 |
| 6 | 100 | 88.48921 | 34.69388 | 100 |
| 7 | 94.11765 | 93.52518 | 47.05882 | 99.61686 |
| 8 | 76.47059 | 97.84173 | 68.42105 | 98.55072 |
| 9 | 70.58824 | 99.64029 | 92.30769 | 98.22695 |
| 10 | 70.58824 | 100 | 100 | 98.23322 |
| 11 | 52.94118 | 100 | 100 | 97.2028 |
| 12 | 41.17647 | 100 | 100 | 96.52778 |
| 13 | 41.17647 | 100 | 100 | 96.52778 |
| 14 | 29.41176 | 100 | 100 | 95.86207 |
| 15 | 29.41176 | 100 | 100 | 95.86207 |

**Supplementary Material 5:** Association between total EPDS scores and factors collected by the participant information survey

| **Variable** | **Categories** | **EPDS Score** median (min- max) | **Group comparisons Mann-Whitney or Kruskal-Wallis** | |
| --- | --- | --- | --- | --- |
| Statistics | P value |

| **Sociodemographic factors** | | | | |
| --- | --- | --- | --- | --- |
| **1. What is your age?** |  |  |  |  |
|  | 19-25 | 2 (0-16) | 2.09 | 0.553 |
|  | 26-30 | 2 (0-16) |  |  |
|  | 31-35 | 2 (0-22) |  |  |
|  | 36 and over | 3 (0-25) |  |  |
| **2. What is your educational status?** |  |  |  |  |
|  | primary education- secondary  education | 4 (0-16) | **18.56** | **< 0.001** |
|  | high school | 3 (0-25) |  |  |
|  | university-college | 2 (0-22) |  |  |
| **3. What is your current employment status?** | working | 2 (0-25) |  |  |
| **4. What is your profession or occupation?** |  |  |  |  |
|  | civil servant public | 2 (0-22) | **8.73** | **0.033** |
|  | private sector  employee | 3 (0-25) |  |  |
|  | private sector  business owner | 3 (0-16) |  |  |
| **5. Do you have social security or any form of social protection?** |  |  |  |  |
|  | no | 5 (0-25) | **1334.50** | **< 0.001** |
|  | yes | 2 (0-22) |  |  |
| **6. How would you describe your current economic situation?** |  |  |  |  |
|  | very good | 4 (0-19) | **9.83** | **0.020** |
|  | good | 2 (0-11) |  |  |
|  | middle | 2 (0-22) |  |  |
|  | bad | 4 (0-25) |  |  |
|  | very bad | - |  |  |
| **7. How many marriages have you been in?** |  |  |  |  |
|  | father's first  marriage | 2 (0-22) | 3379.00 | 0.397 |
|  | father's second  marriage | 2 (0-25) |  |  |
| **8. Can you share details about your marriage agreement or arrangements?** |  |  |  |  |
|  | arranged | 4 (0-25) | **4330.50** | **< 0.001** |

|  | agreement | 2 (0-16) |  |  |
| --- | --- | --- | --- | --- |
| **9. How long you have been married?** |  |  |  |  |
|  | 1-2 years | 2 (0-10) | 5.10 | 0.164 |
|  | 3-4 years | 2 (0-16) |  |  |
|  | 5-9 years | 3 (0-22) |  |  |
|  | >10 years | 3 (0-25) |  |  |
| **10. What is the number of children born from the mother's pregnancy?** |  |  |  |  |
|  | first | 2 (0-22) | 7.37 | 0.061 |
|  | second | 3 (0-16) |  |  |
|  | third | 3 (0-25) |  |  |
|  | fourth | 3 (2-4) |  |  |
| **11. Please write the month of your baby?** |  |  |  |  |
|  | 1 | 3 (0-13) | 9.57 | 0.570 |
|  | 2 | 2 (0-8) |  |  |
|  | 3 | 2 (0-9) |  |  |
|  | 4 | 2 (0-8) |  |  |
|  | 5 | 2 (0-11) |  |  |
|  | 6 | 3 (0-16) |  |  |
|  | 7 | 3 (0-25) |  |  |
|  | 8 | 2 (0-16) |  |  |
|  | 9 | 2.5 (0-7) |  |  |
|  | 10 | 3 (0-19) |  |  |
|  | 11 | 2 (0-7) |  |  |
|  | 12 | 2 (1-13) |  |  |
| **12. Was it a planned pregnancy?** |  |  |  |  |
|  | no | 3 (0-25) | **8535.50** | **0.010** |
|  | yes | 2 (0-16) |  |  |

| **Health information** | | | | |
| --- | --- | --- | --- | --- |
| **13. Do you have any known health problems or medical conditions?** |  |  |  |  |
|  | no | 2 (0-25) | - | - |
| **14. Are you taking any**  **medication regularly for your health?** |  |  |  |  |
|  | no | 2 (0-25) | - | - |
| **15. Can you provide information about your substance use**  **status?** |  |  |  |  |
|  | none | 3 (0-19) | 1.57 | 0.455 |
|  | cigarette | 2 (0-22) |  |  |
|  | cigarettes and  alcohol | 3 (0-25) |  |  |

| **Support** | | | | |
| --- | --- | --- | --- | --- |
| **16. Did anyone support your wife throughout the pregnancy?** |  |  |  |  |
|  | yes | 2 (0-22) | 2456.50 | 0.916 |
|  | no | 2 (0-25) |  |  |
| **17. Did you personally support your wife during pregnancy?** |  |  |  |  |

|  | yes | 2 (0-22) | **6101.00** | **0.002** |
| --- | --- | --- | --- | --- |
|  | no | 4 (0-25) |  |  |
| **18. Did your elder family members support your wife**  **during pregnancy?** |  |  |  |  |
|  | yes | 2 (0-22) | **10092.00** | **< 0.001** |
|  | no | 4 (0-25) |  |  |
| **19. Did your wife's friends help you during pregnancy?** |  |  |  |  |
|  | yes | 2 (0-22) | 7500.00 | 0.110 |
|  | no | 2.5 (0-25) |  |  |
| **20. Was there an assistant caregiver who supported your wife during pregnancy?** |  |  |  |  |
|  | yes | 1 (0-7) | **4725.50** | **0.020** |
|  | no | 3 (0-25) |  |  |
| **21. Did other people provide support to your wife during**  **pregnancy?** |  |  |  |  |
|  | yes | 3.5 (0-16) | 492.50 | 0.593 |
|  | no | 2 (0-25) |  |  |
| **22. Did anyone support your wife after giving birth?** |  |  |  |  |
|  | yes | 2 (0-25) | 1221.00 | 0.333 |
|  | no | 2 (0-10) |  |  |
| **23. Did you support your wife personally after the birth of your child?** |  |  |  |  |
|  | yes | 2 (0-22) | **6367.50** | **< 0.001** |
|  | no | 4 (0-25) |  |  |
| **24. Did family elders support your wife after the birth?** |  |  |  |  |
|  | yes | 2 (0-25) | **7206.00** | **0.002** |
|  | no | 4 (0-16) |  |  |
| **25. Did friends support your wife after the birth?** |  |  |  |  |
|  | yes | 2 (0-22) | 6609.50 | 0.597 |
|  | no | 2 (0-25) |  |  |
| **26. Was there an assistant caregiver who supported your**  **wife after the birth?** |  |  |  |  |
|  | yes | 1 (0-7) | **4996.00** | **0.003** |
|  | no | 3 (0-25) |  |  |
| **27. Did other people provide support to your wife after the birth?** |  |  |  |  |
|  | yes | 5 (2-16) | 228.50 | 0.149 |
|  | no | 2 (0-25) |  |  |

| **Paternal roles and beliefs** | | | | |
| --- | --- | --- | --- | --- |
| **28. How would you rate your level of support to your wife during her pregnancy?** |  |  |  |  |
|  | I was very  supportive | 2 (0-13) | **26.70** | **< 0.001** |
|  | I supported | 3 (0-19) |  |  |
|  | I partially supported | 3.5 (0-22) |  |  |

|  | I did not support | 16 (7-25) |  |  |
| --- | --- | --- | --- | --- |
|  | I never supported | - |  |  |
| **29. How would you evaluate your support to your wife in check-**  **ups while she was pregnant?** |  |  |  |  |
|  | very good | 2 (0-13) | **26.02** | **< 0.001** |
|  | good | 2 (0-22) |  |  |
|  | middle | 5 (0-16) |  |  |
|  | bad | 4 (0-7) |  |  |
|  | too bad | 20.5 (16-25) |  |  |
| **30. How do you rate yourself in terms of paying attention to**  **your wife's nutrition during her pregnancy?** |  |  |  |  |
|  | very good | 2 (0-13) | **35.27** | **< 0.001** |
|  | good | 2 (0-16) |  |  |
|  | middle | 5 (0-22) |  |  |
|  | bad | 1 (0-6) |  |  |
|  | too bad | 13 (8-25) |  |  |
| **31. How do you rate yourself in terms of paying attention to**  **your wife's exercise during her pregnancy?** |  |  |  |  |
|  | very good | 2 (0-19) | **24.67** | **< 0.001** |
|  | good | 2 (0-22) |  |  |
|  | middle | 3 (0-16) |  |  |
|  | bad | 3.5 (0-13) |  |  |
|  | too bad | 2 (0-25) |  |  |
| **32. Did you actively participate in parenting courses?** |  |  |  |  |
|  | totally participated | 1 (0-2) | 1.68 | 0.430 |
|  | participate | - |  |  |
|  | some participation | - |  |  |
|  | not participated | 2.5 (0-7) |  |  |
|  | not participated at  all | 2 (0-25) |  |  |
| **33. How would you rate your level of support to your wife after the birth?** |  |  |  |  |
|  | I was very  supportive | 2.00 (0-13) | **31.58** | **< 0.001** |
|  | I supported | 3.00 (0-22) |  |  |
|  | I partially supported | 4.00 (0-10) |  |  |
|  | I did not support | 16.00 (7-25) |  |  |
|  | I never supported | - |  |  |
| **34. To what extent did the expectant mother support the expectant father during her**  **pregnancy?** |  |  |  |  |
|  | very supportive | 2.00 (0-7) | **32.29** | **< 0.001** |
|  | supported | 2.00 (0-19) |  |  |
|  | partially supported | 4.00 (0-22) |  |  |
|  | did not support | 2.00 (0-11) |  |  |
|  | never supported | 16.00 (4-25) |  |  |
| **35. To what extent did the expectant mother support the expectant father after the**  **birth?** |  |  |  |  |
|  | very supportive | 2.00 (0-22) | 2.22 | 0.695 |

|  | supported | 2.00 (0-19) |  |  |
| --- | --- | --- | --- | --- |
|  | partially supported | 3.00 (0-13) |  |  |
|  | did not support | 2.50 (0-11) |  |  |
|  | never supported | 2.00 (0-25) |  |  |
| **36. Do you agree with the view that "only the mother is enough to care for and raise the child"?** |  |  |  |  |
|  | I don't agree at all | 2.00 (0-16) | **39.55** | **< 0.001** |
|  | I do not agree | 2.00 (0-19) |  |  |
|  | no idea | 6.50 (2-22) |  |  |
|  | I agree | 6.00 (0-11) |  |  |
|  | I totally agree | 5.00 (0-25) |  |  |
| **37. Do you agree with the view that "the father has as much responsibility as the mother in the child's growth"?** |  |  |  |  |
|  | I totally agree | 2.00 (0-19) | **16.66** | **0.002** |
|  | I agree | 3.00 (0-16) |  |  |
|  | no idea | 8.00 (7-22) |  |  |
|  | I do not agree | 6.00 (0-8) |  |  |
|  | I don't agree at all | 10.00 (0-25) |  |  |
| **38. How do you see yourself in**  **terms of adequacy as a father?** |  |  |  |  |
|  | very sufficient | 2 (0-7) | **44.47** | **< 0.001** |
|  | sufficient | 3 (0-16) |  |  |
|  | partially sufficient | 6 (0-16) |  |  |
|  | not enough | 5 (0-19) |  |  |
|  | not enough at all | 7 (5-25) |  |  |
| **39. How much time do you devote to taking care of your baby?** |  |  |  |  |
|  | a lot of time | 2 (0-13) | **22.60** | **< 0.001** |
|  | enough time | 2 (0-19) |  |  |
|  | some time | 4.5 (0-16) |  |  |
|  | can't spare time | 5 (0-13) |  |  |
|  | any time | 23.5 (22-25) |  |  |
| **40. How much do you help in the care of the baby?** |  |  |  |  |
|  | I am very helpful | 2 (0-19) | **16.30** | **0.003** |
|  | I help | 2 (0-8) |  |  |
|  | I can help partially | 2 (0-16) |  |  |
|  | I’m not helping | 6 (0-22) |  |  |
|  | I’m not helping at  all | 5.5 (2-25) |  |  |
| **41. How well do you think you are fulfilling your responsibilities as a father?** |  |  |  |  |
|  | I completely fulfil | 2 (0-10) | **32.77** | **< 0.001** |
|  | I fulfil | 3 (0-19) |  |  |
|  | I fulfil a little | 6 (2-16) |  |  |
|  | I can't fulfil | 7 (0-9) |  |  |
|  | I can't fulfil at all | 22 (11-25) |  |  |
